# Supplementary material
Source: PubMed Central journal article supplement (PMC4324692)

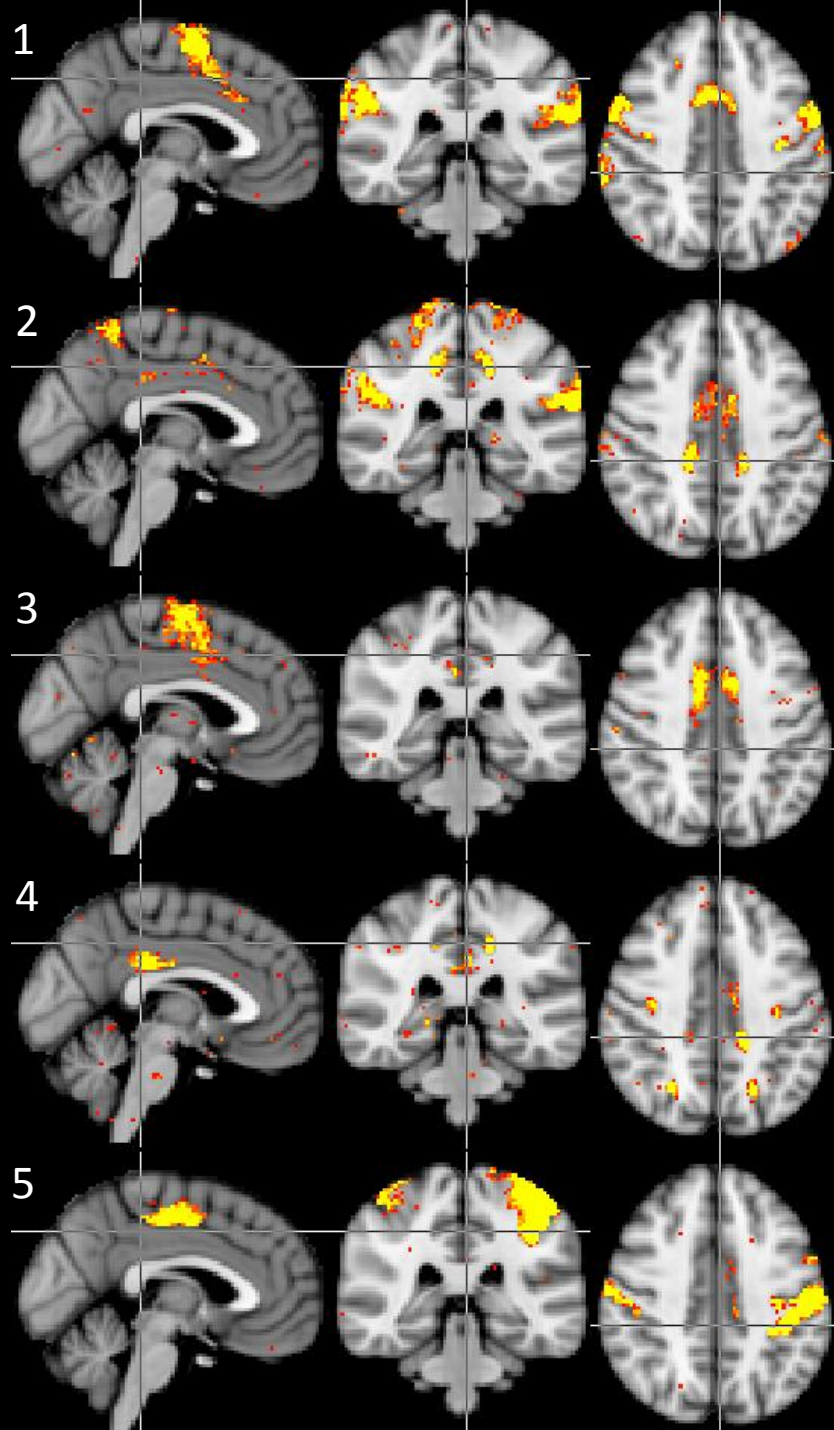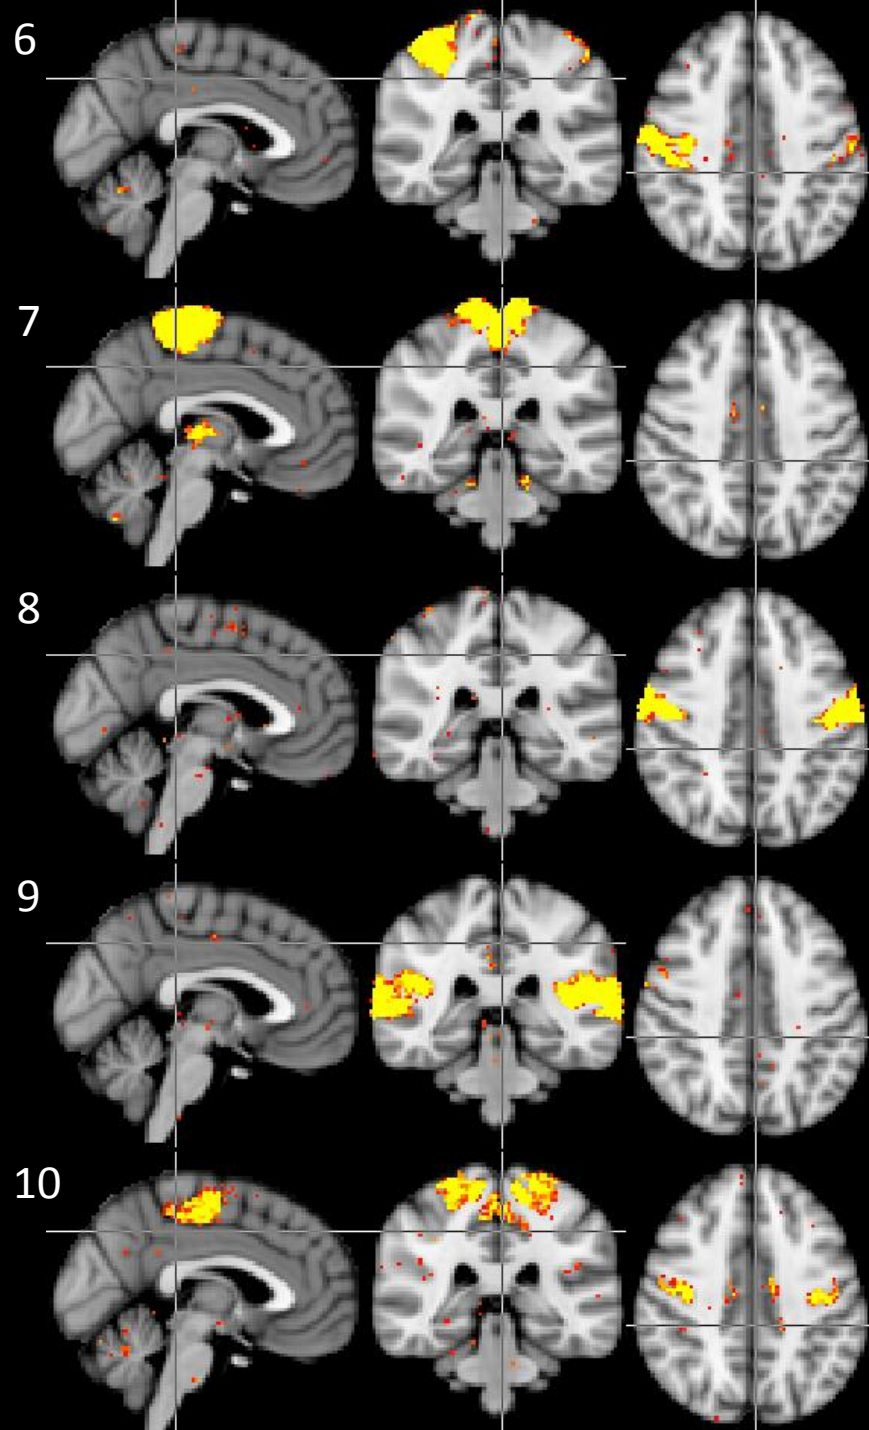

Supplement: NIHMS649405-supplement-Color_version_of_figure.pdf [file NIHMS649405-supplement-Color_version_of_figure.pdf]
